# Supplementary material for: Maillard-type glycated collagen with alginate oligosaccharide suppresses inflammation and oxidative stress by attenuating the expression of LPS receptors Tlr4 and Cd14 in macrophages
Source: Royal Society of Chemistry journal article supplement (doi:10.1039/d3fo02731g), 2024-01-01
Supplement: d3fo02731g1.pdf [file d3fo02731g1.pdf]

### Supplementary data

#### **Supplementary Fig. 1. Sugar alone exhibited no anti-inflammatory activity.**

Effect of reducing sugars on the secretion of TNF- $\alpha$  (A), IL-6 (B), and IL-1 $\beta$  (C) in LPS-stimulated macrophages; Con.: control group, in which the cells were not treated with LPS or sugars. LPS: LPS group, in which the cells were treated with LPS only. AO: AO-treated group, in which the cells received both AO and LPS treatment. Glc: Glc-treated group, in which the cells received both Glc and LPS treatments. Both AO and Glc were used at 0.25 mg/ml; this concentration was the maximum sugar concentration, assuming that all reducing sugars were bound to collagen. The results are expressed as the Mean  $\pm$  SD (n = 5); \*\* and \*\*\* indicate significant differences at  $P < 0.01$  and  $P < 0.001$  compared to the LPS group by Dunnett's multiple comparison.
