# Supplementary figures and images for: Maillard-type glycated collagen with alginate oligosaccharide suppresses inflammation and oxidative stress by attenuating the expression of LPS receptors Tlr4 and Cd14 in macrophages
Source: Royal Society of Chemistry journal article supplement (doi:10.1039/d3fo02731g), 2024-01-01

## Supplementary Fig. 1

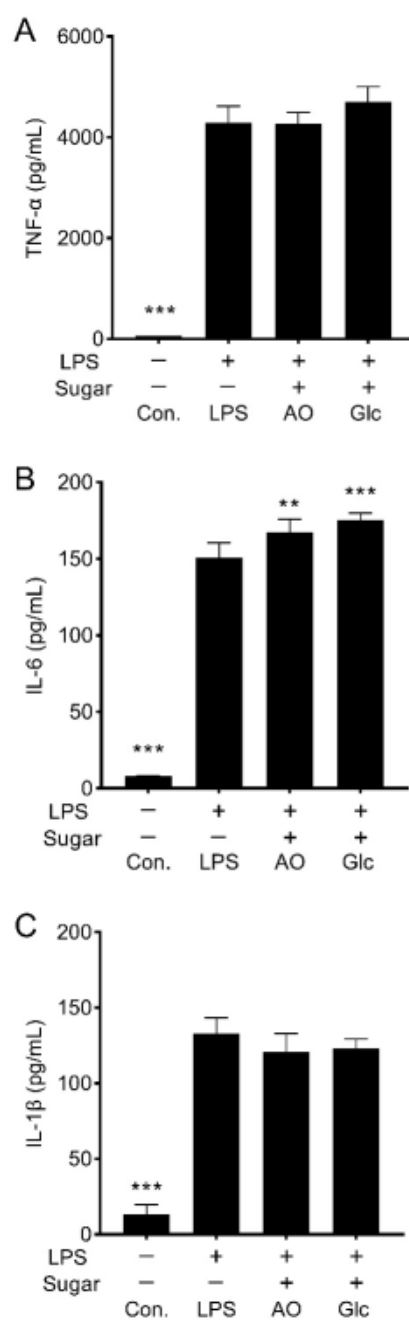

Supplement: d3fo02731g2.pdf [file d3fo02731g2.pdf]
